# Supplementary material for: High-temperature lead-free multilayer ceramic capacitors with ultrahigh energy density and efficiency fabricatedviatwo-step sintering
Source: Royal Society of Chemistry journal article supplement (doi:10.1039/c9ta04317a), 2019-01-01
Supplement: c9ta04317a1.pdf [file c9ta04317a1.pdf]

# High-temperature lead-free multilayer ceramic capacitors with ultrahigh energy density and efficiency via fast two-step sintering

## Supporting information

Ziming Cai<sup>a</sup>, Chaoqiong Zhu<sup>a</sup>, Hongxian Wang<sup>a</sup>, Peiyao Zhao<sup>a</sup>, Lingling Chen<sup>a</sup>, Longtu Li<sup>a</sup>, Xiaohui Wang<sup>a,\*</sup>

<sup>a</sup>State Key Laboratory of New Ceramics and Fine Processing, School of Materials Science and Engineering, Tsinghua University, Beijing 100084, China

### Corresponding Author

\*Xiaohui Wang, E-mail: wxh@mail.tsinghua.edu.cn

### 1. Phase-field dielectric breakdown model

By drawing an analogy between dielectric breakdown and mechanical fracture, a scalar spatially and temporally dependent damage field  $s(x, t)$  is introduced to characterize the breakdown process of a selected region of MLCCs.<sup>1-3</sup> The value of  $s$  varies from 1 to 0, representing the intact state and the fully damaged state, respectively. The fully damaged material becomes conductive. Numerically, a large but finite permittivity  $\varepsilon^0/\eta$  is taken for such material part, where  $\varepsilon^0$  is the initial permittivity and  $\eta$  is a small enough number. For any other intermediate state of dielectric layer material, the permittivity is interpolated by

$$\varepsilon(s) = \frac{\varepsilon^0}{f(s) + \eta}, \quad (1)$$

where  $f(s) = 4s^3 - 3s^4$ . Breakdown happens if the process decreases the total potential energy of the system,

$$\Pi[s, \phi] = \int_{\Omega} [W_{es}(E, s) + W_d(s) + W_i(\nabla s)] dV, \quad (2)$$

where  $W_{es}(E, s) = -\frac{\varepsilon}{2} E \cdot E$  is the complementary electrostatic energy per unit volume,

$W_d(s) = W_c[1 - f(s)]$  is the breakdown energy function with  $W_c$  representing the

critical density of electrostatic energy,  $W_i(\nabla s) = \frac{\Gamma}{4} \nabla s \cdot \nabla s$  is the gradient energy term

to regulate sharp phase boundaries. Notably, the material parameter  $\Gamma$  is approximately

the breakdown energy. According to linear kinetic law:  $\partial s / \partial t = -m \delta \Pi / \delta s$ , the

evolution equation for breakdown variable  $s$  can be obtained after substituting in

detailed forms of the energy functions:

$$\frac{1}{m} \frac{\partial s}{\partial t} = \frac{\varepsilon'(s)}{2} \nabla \phi \cdot \nabla \phi + W_c f'(s) + \frac{\Gamma}{2} \nabla^2 s. \quad (3)$$

Here, mobility  $m$  is a material parameter that indicates the speed of breakdown

propagation in dielectric layers of MLCCs. By normalizing all lengths by  $l$ , energy

densities by  $W_c$ , time by  $l^2 / m \Gamma$ , and electric potential by  $\sqrt{\Gamma / \varepsilon^0}$ , the final normalized

governing equations of dimensionless form can be written as:

$$\nabla \cdot \left[ \frac{1}{f(s) + \eta} \nabla \bar{\phi} \right] = 0, \quad (4)$$

$$\frac{\partial s}{\partial t} = - \frac{f'(s)}{2[f(s) + \eta]^2} \nabla \bar{\phi} \cdot \nabla \bar{\phi} + f'(s) + \frac{1}{2} \nabla^2 s, \quad (5)$$

in which the corresponding quantities are symbolized with over-bars. The dielectric

breakdown behavior of MLCCs can be simulated by implementing the normalized

governing equations (4) and (5) into COMSOL Multiphysics platform. The voltage

between two electrodes is applied quasi-statically by controlling the total charge

accumulation of the negative electrode.

## 2. Microstructure and electrical properties of MLCCs sintered with various first-step heating rate

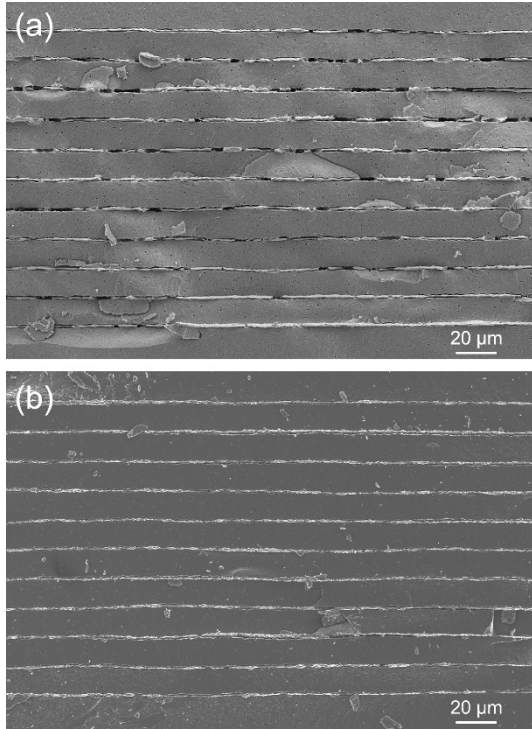

Figure S1. Large-view cross-sectional SEM images of the MLCCs sintered with the first-step heating rate of (a) 4 °C/min, (b) 40 °C/min, in which the pores and discontinuity of internal electrodes can be distinguished more clearly.

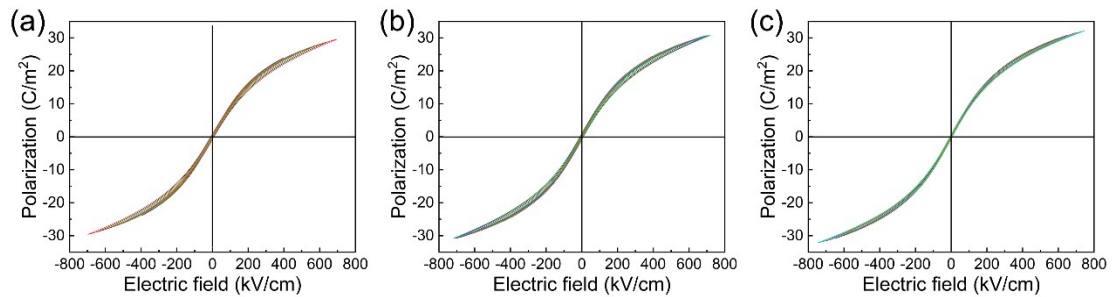

Figure S2. Hysteresis loops of MLCCs sintered with the first-step heating rate of (a) 4 °C/min, (b) 20 °C/min, (c) 40 °C/min, measured under various applied electric field at

1Hz.

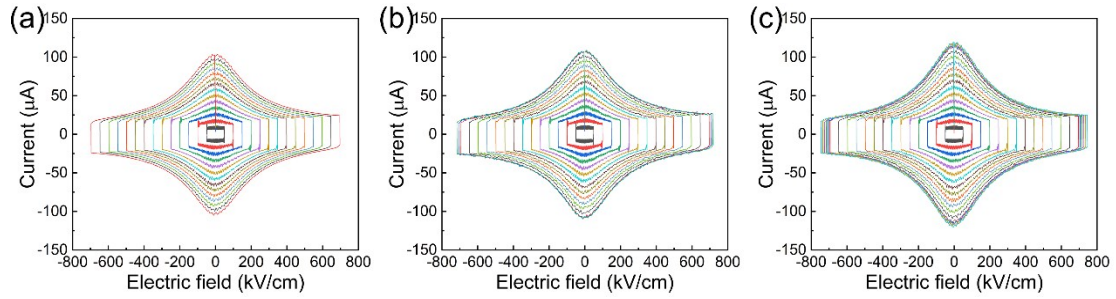

Figure S3. The current-electric-field relation of MLCCs sintered with the first-step heating rate of (a) 4 °C/min, (b) 20 °C/min, (c) 40 °C/min, measured under various applied electric field at 1Hz, corresponding to Figure S2.

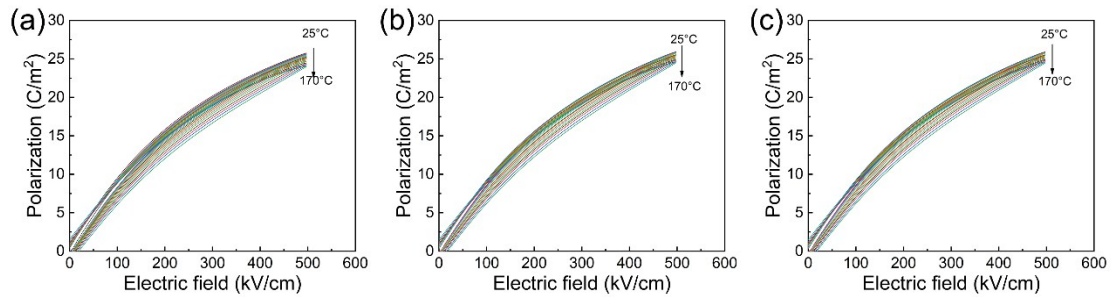

Figure S4. The temperature-dependent unipolar hysteresis loop the MLCCs sintered with the first-step heating rate of (a) 4 °C/min, (b) 20 °C/min, (c) 40 °C/min, measured under the maximum electric field of 500 kV/cm at 1 Hz.

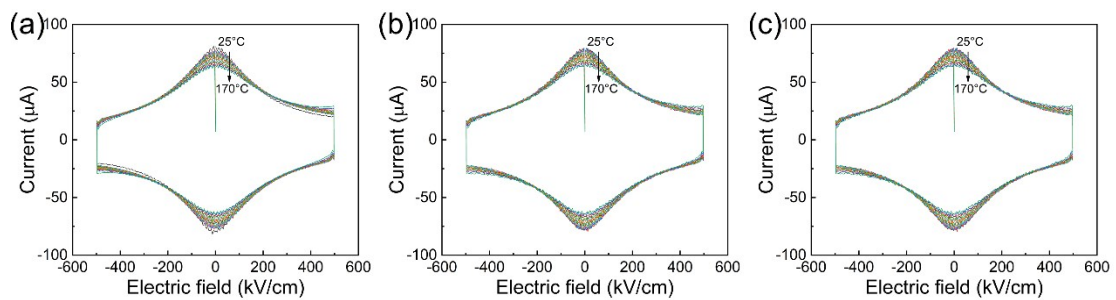

Figure S5. The temperature-dependent current-electric-field relation the MLCCs sintered with the first-step heating rate of (a) 4 °C/min, (b) 20 °C/min, (c) 40 °C/min, measured under the maximum electric field of 500 kV/cm at 1 Hz, corresponding to Figure S4.

Table S1. The insulation resistivity of the MLCCs with various first-step heating rate of 4 °C/min (MLCC-4), 20 °C/min (MLCC-20) and 40 °C/min (MLCC-40).

| Samples | Insulation resistivity ( $\times 10^{11} \Omega m$ ) |
|---------|------------------------------------------------------|
| MLCC-4  | 5.92                                                 |
| MLCC-20 | 11.6                                                 |
| MLCC-40 | 63.6                                                 |

### 3. Two-step sintering method

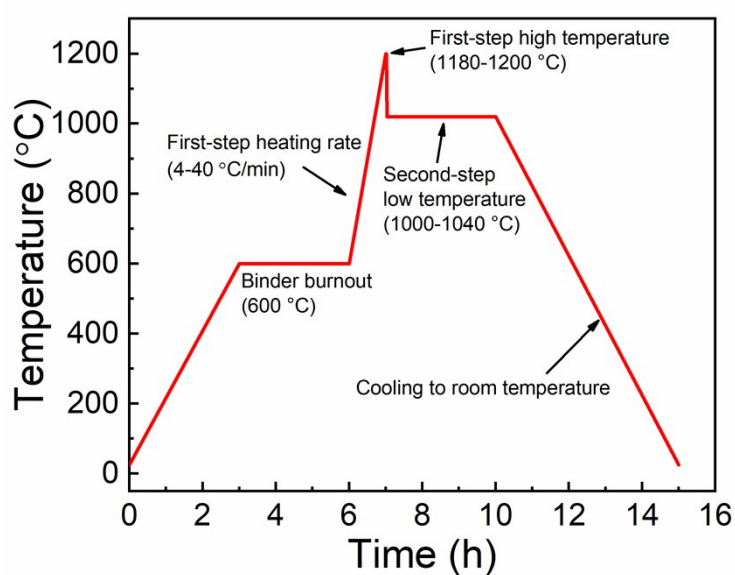

Figure S6. The two-step sintering schedule of MLCCs with the first-step heating rate of 4 °C/min, 20 °C/min and 40 °C/min, respectively.

## References:

1. K. C. Pitike and W. Hong, *J. Appl. Phys.*, 2014, **115**, 044101.
2. Z. Cai, X. Wang, B. Luo, W. Hong, L. Wu and L. Li, *Compos. Sci. Technol.*, 2017, **151**, 109-114.
3. Z. Cai, X. Wang, B. Luo, W. Hong, L. Wu and L. Li, *Compos. Sci. Technol.*, 2017, **145**, 105-113.
